# Supplementary material
Source: PubMed Central journal article supplement (PMC3590093)
Supplement: supp_2012.066167_2012_066167-Contributions.pdf [file supp_2012.066167_2012_066167-Contributions.pdf]

**Manuscript no. HAEMATOL/2012/066167 entitled “Leukocyte- and endothelial-derived microparticles: a circulating source for fibrinolysis”**

**Authors: Romaric Lacroix, Laurent Plawinski, Stéphane Robert, Loïc Doeuvre, Florence Sabatier, Sara Martinez de Lizarrondo, Anna Mezzapesa, Francine Anfosso, Aurelie S. Leroyer, Pascale Poullin, Noémie Jourde, Makon-Sébastien Njock, Chantal M. Boulanger, Eduardo Anglés-Cano, and Françoise Dignat-George**

**Information about the contributions of each person named as having participated in the study**

- 1) Guarantor(s)**, i.e., person(s) who is (are) responsible for the integrity of the work as a whole:
- Eduardo Anglés-Cano, Inserm U765, email Eduardo.Angles-Cano@inserm.fr
  - Françoise Dignat-George, Inserm UMR-S1076, email dignat@pharmacie.univ-mrs.fr

According to the International Committee of Medical Journal Editors (ICMJE) ([http://www.icmje.org/ethical\\_1author.html](http://www.icmje.org/ethical_1author.html)): “*Authorship credit should be based on: 1) substantial contributions to conception and design, acquisition of data, or analysis and interpretation of data; 2) drafting the article or revising it critically for important intellectual content; and 3) final approval of the version to be published. Authors should meet conditions 1, 2, and 3 ..... Acquisition of funding, collection of data, or general supervision of the research group alone does not constitute authorship*”.

The guarantors of this manuscript confirm that all persons designated as authors qualify for authorship, and that each author has participated sufficiently in the work to take public responsibility for appropriate portions of the content.

2) Authors who participated in the **conception of the study**: Eduardo Anglés-Cano, Françoise Dignat-George, Laurent Plawinski, Romaric Lacroix

3) **Design & Methods**. The following authors were responsible for specific investigations (please detail):

- Laurent Plawinski and Romaric Lacroix performed the isolation and characterization (all identification and functional aspects) of cellular microvesicles.
- Laurent Plawinski performed all plasminogen activation and plasminogen activator characterization studies.
- Stéphane Robert, Sara Martinez de Lizarrondo and Makon-Sébastien Njock contributed to isolation and purification of microparticle subpopulations
- Anna Mezzapesa, Loïc Doeuvre and Francine Anfosso participated in in vitro microvesicle production and data interpretation.
- Aurelie S. Leroyer and Chantal M. Boulanger contributed to atherosclerotic patient experiments and editing of the manuscript
- Pascale Poullin was responsible for thrombotic thrombocytopenic patient studies
- Noémie Jourde was responsible for systemic lupus erythematosus patient studies
- Florence Sabatier participated in experiment design and data analysis

4) **Results**. The following authors were responsible for specific portions of the results, including figures and tables (please indicate the person responsible for each figure and each table):

- Laurent Plawinski and Romaric Lacroix collected, analyzed and interpreted data.
- Laurent Plawinski and Romaric Lacroix were responsible for figures 1, 3 and 4
- Laurent Plawinski was responsible for figure 2 and Online Supplementary figures S4, S5, S6 and S7.
- Romaric Lacroix was responsible for On Line Supplementary figures S1, S2 and S3.

**5) Writing the manuscript.** The following authors were responsible for writing the manuscript:

- Laurent Plawinski, Romaric Lacroix, Françoise Dignat-George and Eduardo ANGLES-CANO were responsible for drafting and final writing of the manuscript.
- Chantal M Boulanger participated in manuscript revision and editing.

**6) Contributors Listed in Acknowledgments:**

Philippe Poncelet and Tarik Bouriche (Biocytex, Marseille, France) provided technical help on immunomagnetic separation experiments. Christophe Dubois (Université de la Méditerranée, Marseille, France) contributed to human platelet isolation. Laurent Chiche (Conception University Hospital, Marseille, France) was clinical advisor. Denis Vivien, department chair (U919 Inserm, Caen, France) provided general support. Financial support was provided by the Institut National de la Santé et de la Recherche Médicale (Inserm) and Aix Marseille University.
